# Supplementary material for: A facile coprecipitation approach for synthesizing LaNi0.5Co0.5O3 as the cathode for a molten-salt lithium–oxygen battery
Source: Royal Society of Chemistry journal article supplement (doi:10.1039/d3fd00078h), 2023-06-19
Supplement: d3fd00078h1.pdf [file d3fd00078h1.pdf]

## Supporting information

### **A facile coprecipitation approach for synthesizing $\text{LaNi}_{0.5}\text{Co}_{0.5}\text{O}_3$ as cathode for molten salt lithium oxygen battery**

Qianyuan Qiu<sup>1</sup>, Jiaqi Wang<sup>1,2</sup>, Penghui Yao<sup>1</sup>, Yongdan Li<sup>1,\*</sup>

<sup>1</sup> *Department of Chemical and Metallurgical Engineering, Aalto University, Kemistintie 1, FI-00076 Aalto, Finland*

<sup>2</sup> *Flexible Printed Electronic Technology Center and State Key Laboratory of Advanced Welding and Joining, Harbin Institute of Technology, Shenzhen 518055, China*

*Corresponding Author: Yongdan Li, email: yongdan.li@aalto.fi*

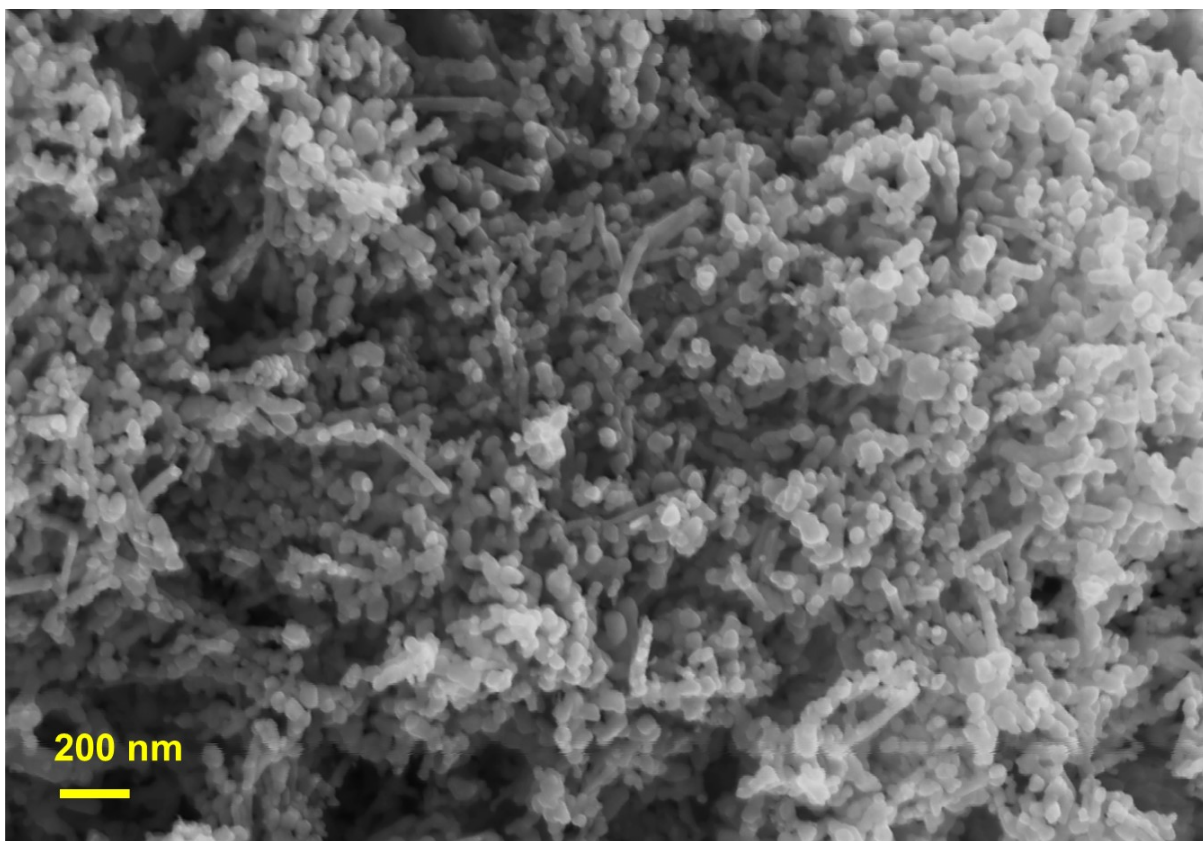

Fig. S1 SEM image of pristine LNCO.

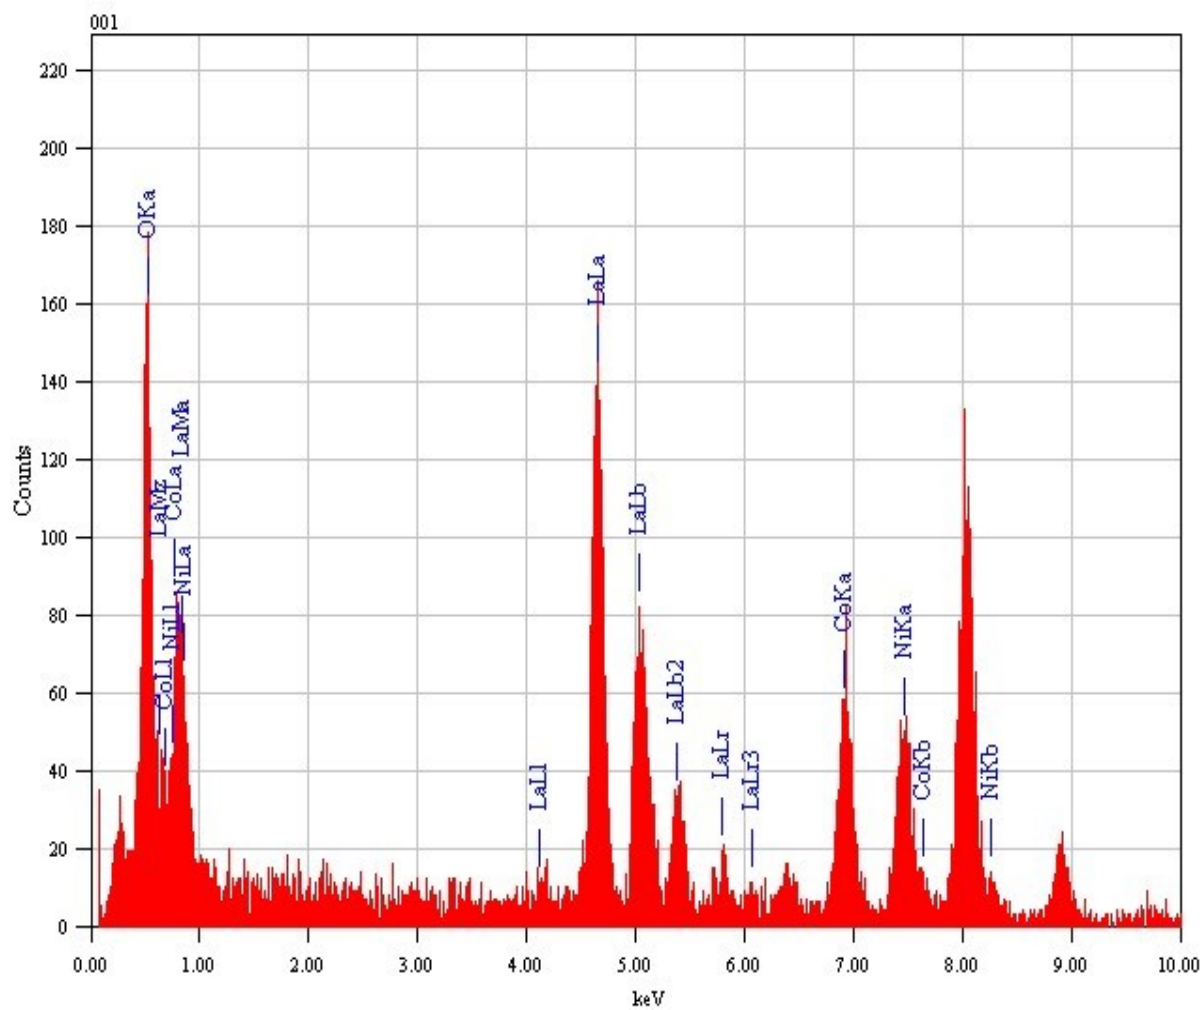

Fig. S2 The EDS spectrum of LNCO.
